# Supplementary material for: The Regulatory T Cell Lineage Factor Foxp3 Regulates Gene Expression through Several Distinct Mechanisms Mostly Independent of Direct DNA Binding
Source: PubMed Central journal article supplement (PMC4480970; doi:10.1371/journal.pgen.1005251), 2015-06-24
Supplement: pgen.1005251.s002.pdf [file pgen.1005251.s002.pdf]

**A**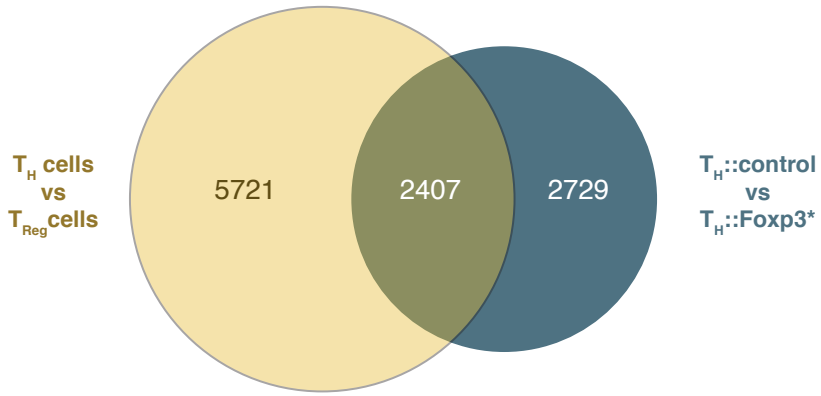**B**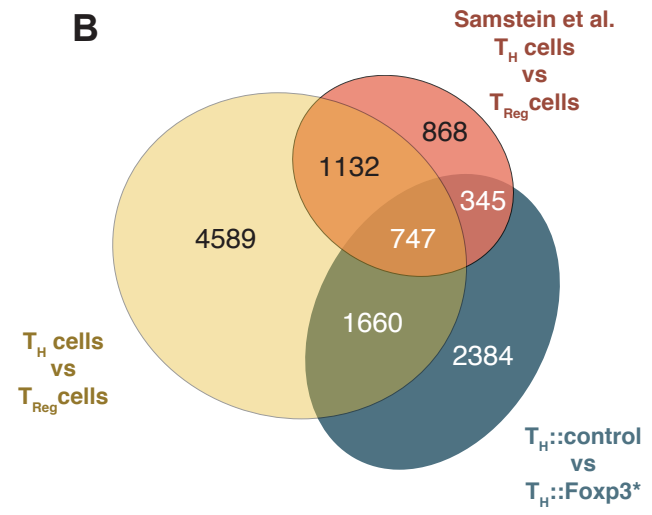**C**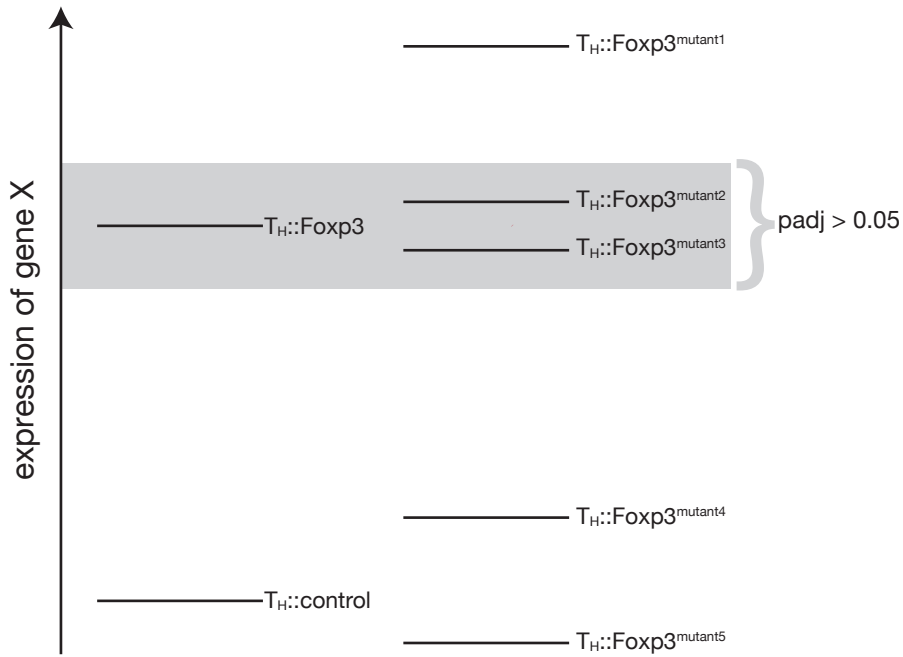

|         | differentially expressed | dysregulated |
|---------|--------------------------|--------------|
| mutant1 | ✓                        | ✗            |
| mutant2 | ✗                        | ✗            |
| mutant3 | ✗                        | ✗            |
| mutant4 | ✓                        | ✓            |
| mutant5 | ✓                        | ✓            |
