# Supplementary material for: The Regulatory T Cell Lineage Factor Foxp3 Regulates Gene Expression through Several Distinct Mechanisms Mostly Independent of Direct DNA Binding
Source: PubMed Central journal article supplement (PMC4480970; doi:10.1371/journal.pgen.1005251), 2015-06-24

T<sub>H</sub> cells

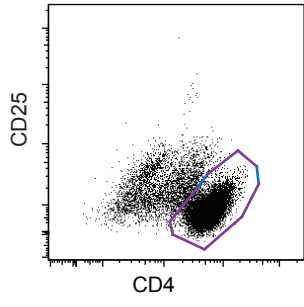

T<sub>H</sub>::Foxp3 cells

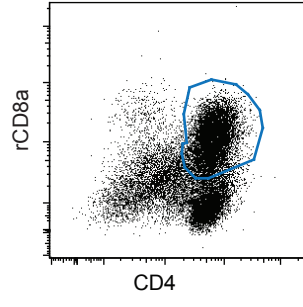

T<sub>reg</sub> cells

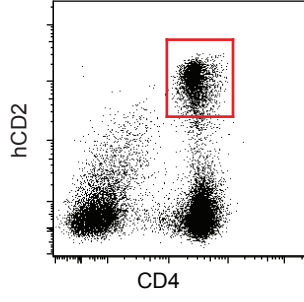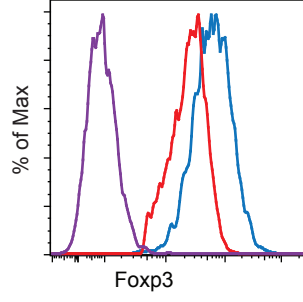

Supplement: pgen.1005251.s004.pdf [file pgen.1005251.s004.pdf]
