# Supplementary material for: The Regulatory T Cell Lineage Factor Foxp3 Regulates Gene Expression through Several Distinct Mechanisms Mostly Independent of Direct DNA Binding
Source: PubMed Central journal article supplement (PMC4480970; doi:10.1371/journal.pgen.1005251), 2015-06-24

DAPI

Foxp3

Merged

Foxp3

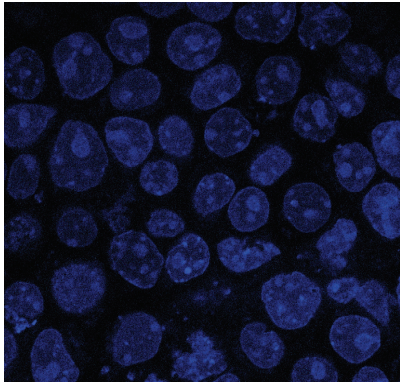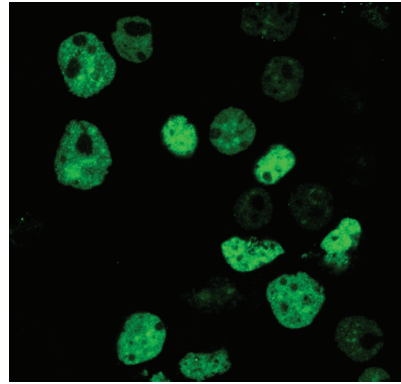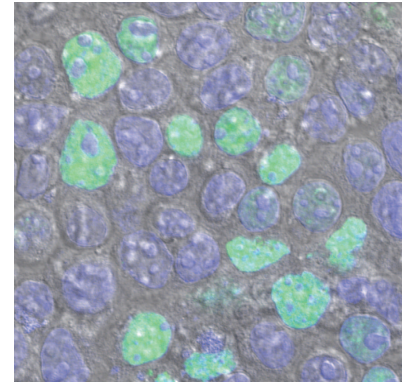

Foxp3 $\Delta^{FKH}$

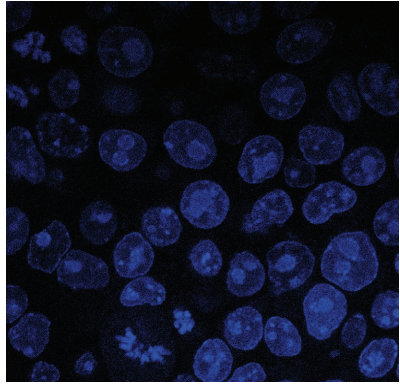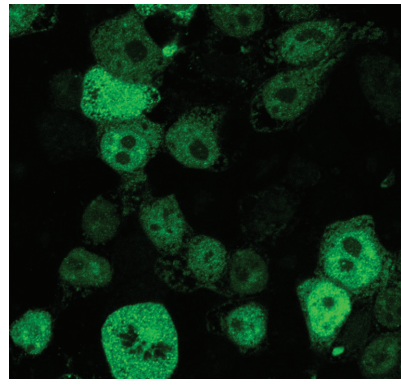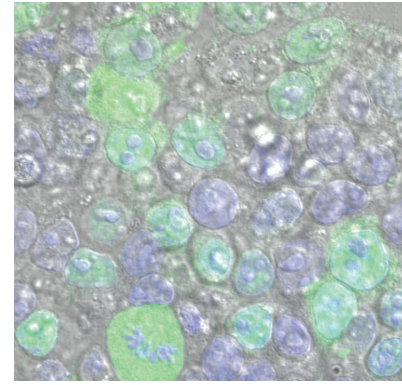

Foxp3 $\Delta^{FKHnls}$

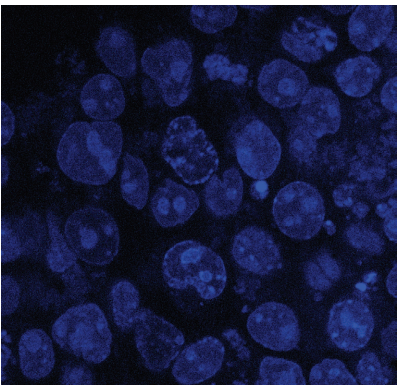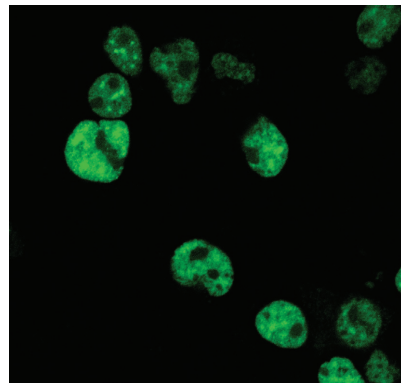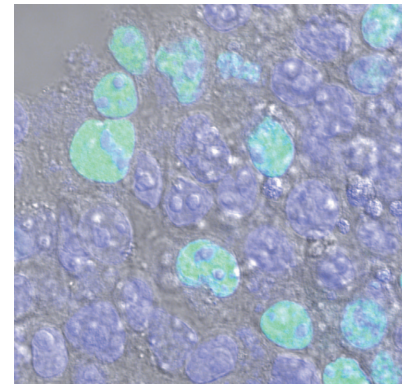

Supplement: pgen.1005251.s005.pdf [file pgen.1005251.s005.pdf]
