# Supplementary material for: The Regulatory T Cell Lineage Factor Foxp3 Regulates Gene Expression through Several Distinct Mechanisms Mostly Independent of Direct DNA Binding
Source: PubMed Central journal article supplement (PMC4480970; doi:10.1371/journal.pgen.1005251), 2015-06-24

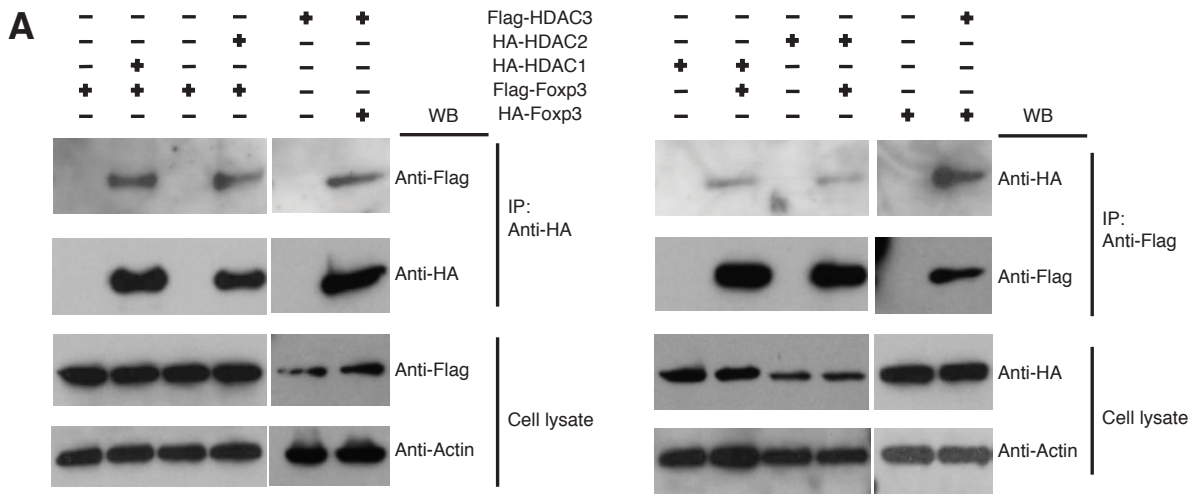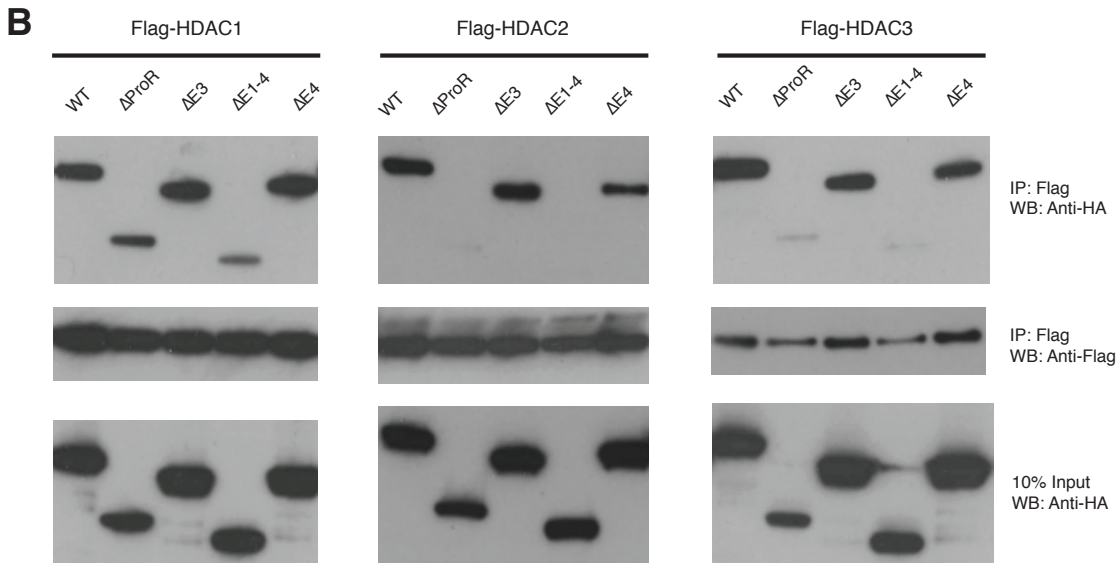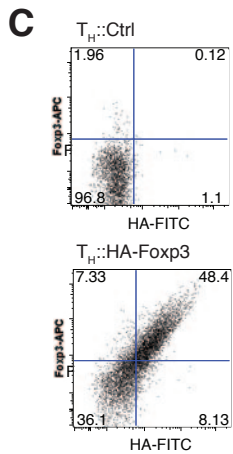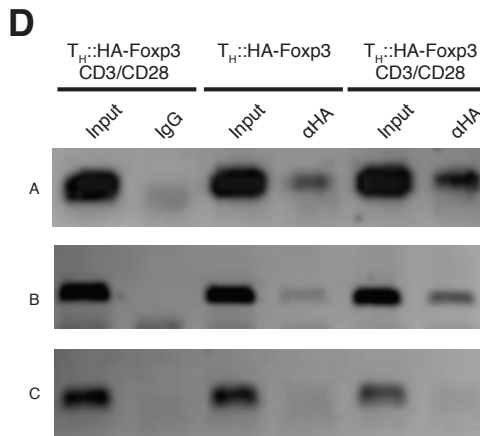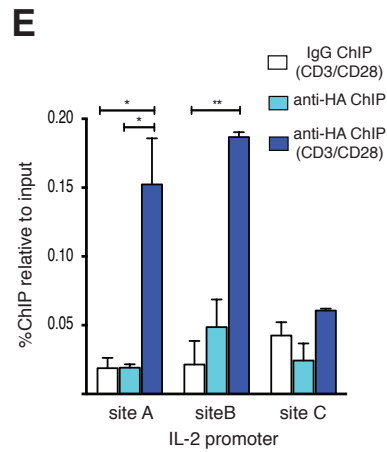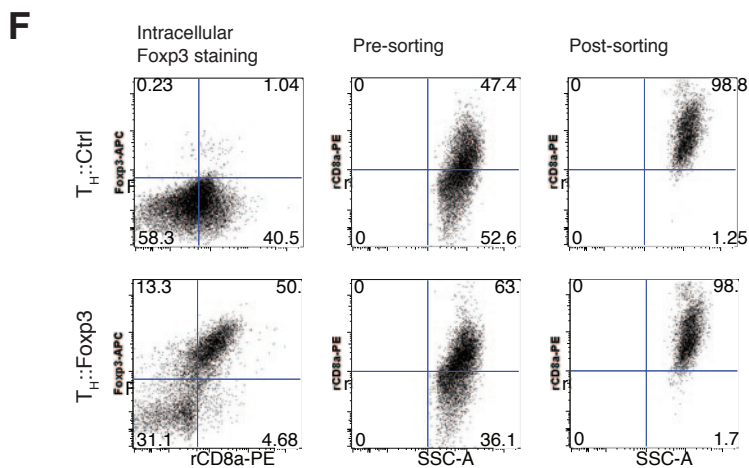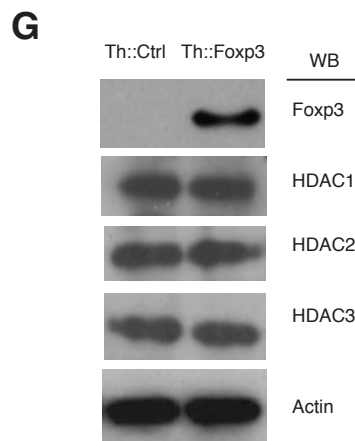

Supplement: pgen.1005251.s007.pdf [file pgen.1005251.s007.pdf]
