# Supplementary material for: The Regulatory T Cell Lineage Factor Foxp3 Regulates Gene Expression through Several Distinct Mechanisms Mostly Independent of Direct DNA Binding
Source: PubMed Central journal article supplement (PMC4480970; doi:10.1371/journal.pgen.1005251), 2015-06-24

**A**

resting

activated

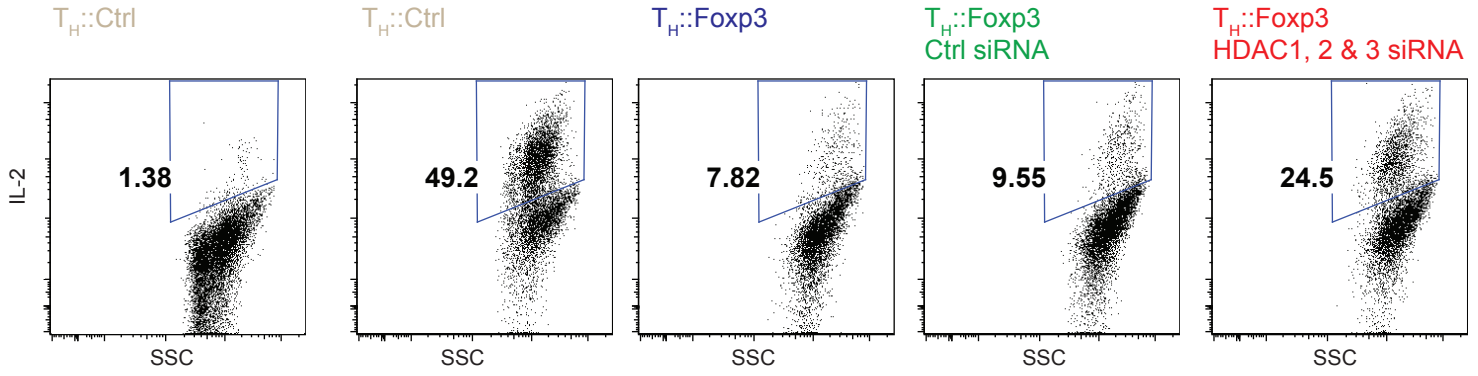**B**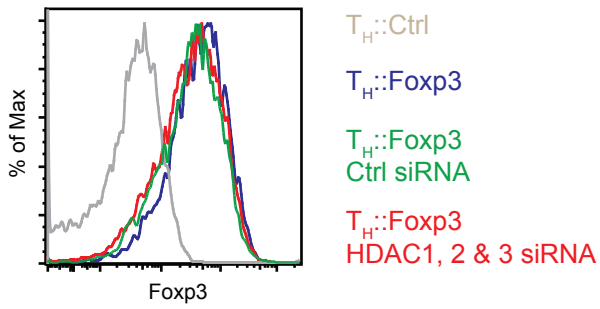**C**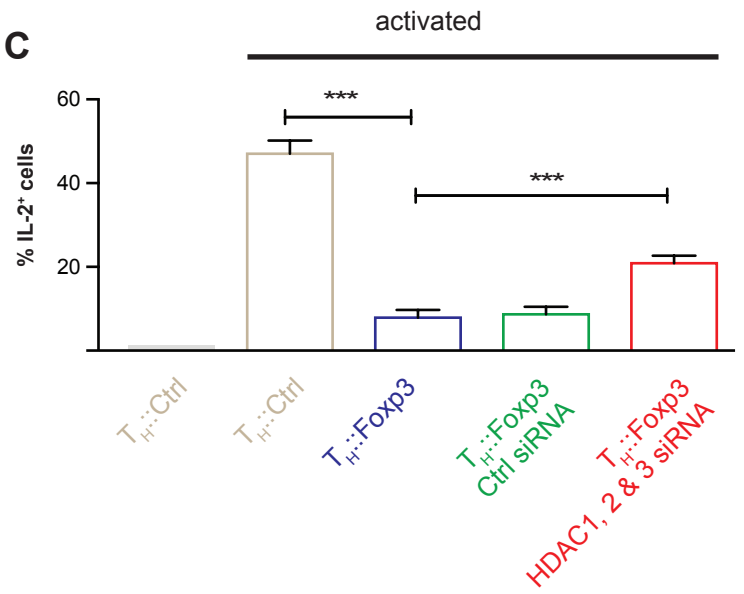

Supplement: pgen.1005251.s008.pdf [file pgen.1005251.s008.pdf]
